# Supplementary material for: Larvicidal Activity of Carbon Black against the Yellow Fever Mosquito Aedes aegypti
Source: MDPI journal article supplement (doi:10.3390/insects13030307), 2022-03-20
Supplement: s1 [file s1]

# Supplementary Materials:

**Table S1.** Mortality of 3<sup>rd</sup> instar larvae and pupae exposure to E1800 for 48 h. No mortality was observed in pyrethroid-susceptible (PS) or pyrethroid-resistant (PR) strains (n=6 replicates containing 3 larvae and 3 pupae per treatment). Values are means  $\pm$  standard errors of the mean.

| E1800 mg/ml | 3 <sup>rd</sup> Instar PR | Pupae PR   | 3 <sup>rd</sup> Instar PR | Pupae PR   |
|-------------|---------------------------|------------|---------------------------|------------|
| 0.1         | 0% $\pm$ 0                | 0% $\pm$ 0 | 0% $\pm$ 0                | 0% $\pm$ 0 |
| 1           | 0% $\pm$ 0                | 0% $\pm$ 0 | 0% $\pm$ 0                | 0% $\pm$ 0 |
| 5           | 0% $\pm$ 0                | 0% $\pm$ 0 | 0% $\pm$ 0                | 0% $\pm$ 0 |

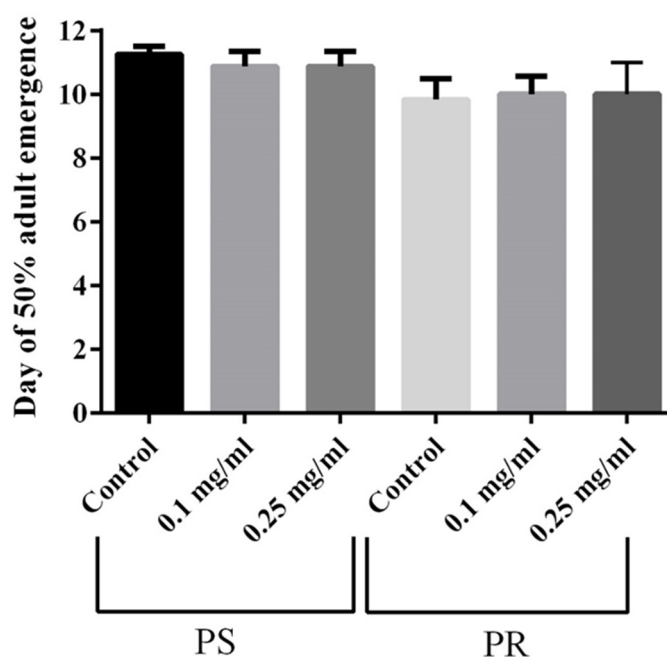

**Figure S1.** Adult emergence of *Ae. aegypti* pyrethroid-susceptible (PS) and pyrethroid-resistant (PR) strains after E1800 exposure at 0.1 mg/ml. The 'x axis' indicates the E1800 concentrations used against larvae of each strain. The 'y axis' represents the day at which 50% of adult emergence was attained. Values are means  $\pm$  standard errors of the mean. There were no significant differences observed between treatments and their respective controls (one-way ANOVA).
